# Supplementary material for: Indistinguishable Landscapes of Meiotic DNA Breaks in rad50+ and rad50S Strains of Fission Yeast Revealed by a Novel rad50+ Recombination Intermediate
Source: PLOS journal article supplement (doi:10.1371/journal.pgen.1000267), 2008-11-20
Supplement: S3 (10.1371/journal.pgen.1000267.s003) [file journal.pgen.1000267.s003]

*rad50<sup>+</sup>**rad50S**ade6-3049*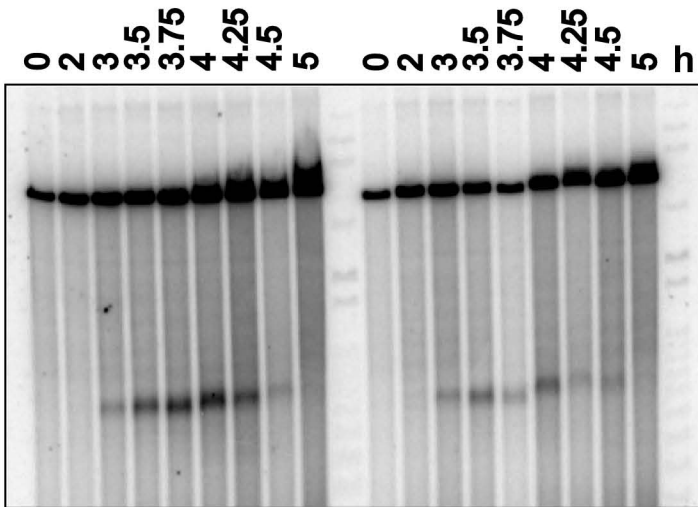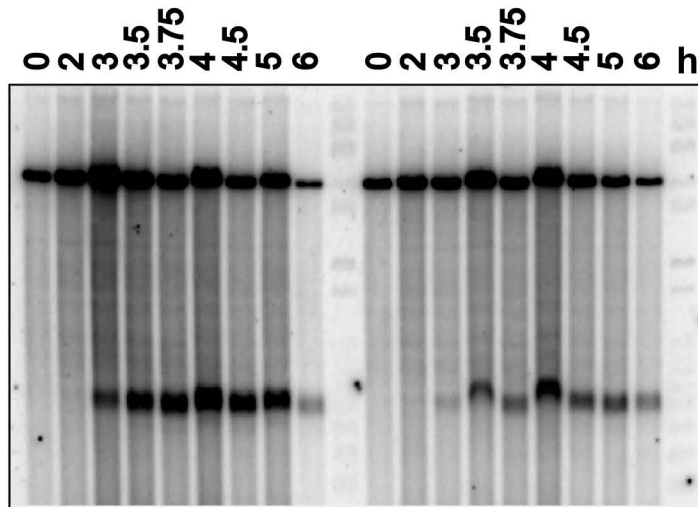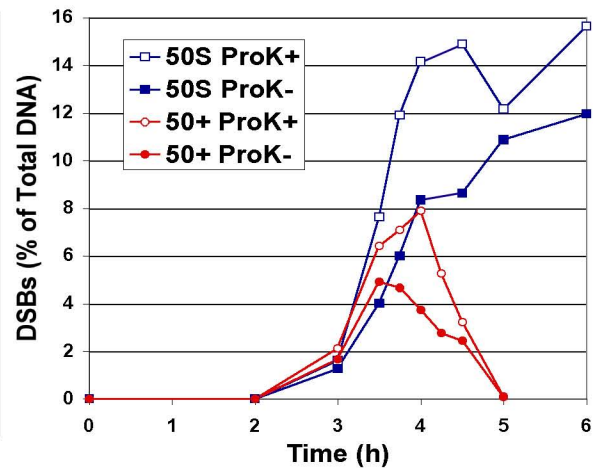*mbs1*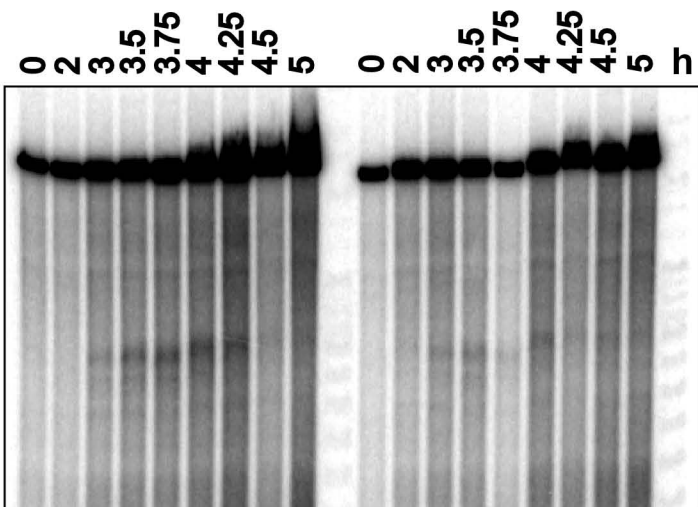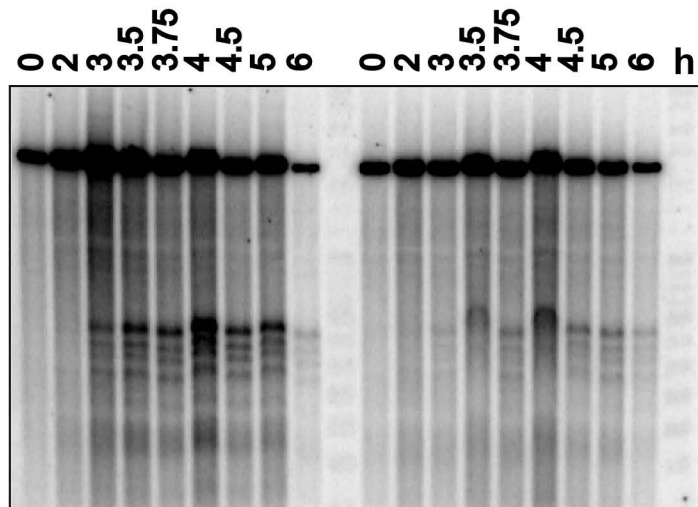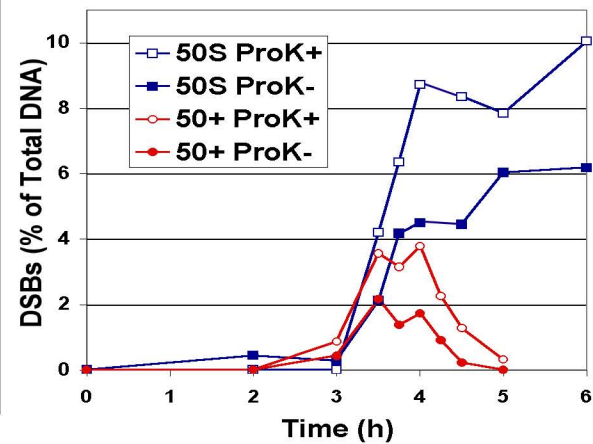

+ Proteinase K    - Proteinase K

+ Proteinase K    - Proteinase K
